# Supplementary material for: A Polycomb-mir200 loop regulates clinical outcome in bladder cancer
Source: PubMed Central journal article supplement (PMC4747223; doi:10.18632/oncotarget.5546), 2015-10-17
Supplement: oncotarget-06-42258-s001.pdf [file oncotarget-06-42258-s001.pdf]

## SUPPLEMENTARY TABLES AND FIGURES

**Supplementary Table S1: Baseline Characteristics of the patients and Clinicopathological results in the series**

| Patients (n)                       | 87                                                           |
|------------------------------------|--------------------------------------------------------------|
| Age median (range)                 | 73.0 yr (49–90)                                              |
| Sex                                | M = 68<br>F = 19                                             |
| Smoker status                      | No = 15<br>Currently smoker = 27<br>Ex smoker = 43<br>ND = 2 |
| Stage                              | Papilloma = 1<br>Ta = 40<br>T1 = 36<br>T2 = 10               |
| Grade                              | Low = 45<br>High = 37<br>PUNLMP = 4<br>ND = 1                |
| Alterations in normal mucosa       | Dysplasia = 6<br>Metaplasia = 1<br>Glandular cystitis = 1    |
| Follow up, median (range)          | 864 d (34–1123)                                              |
| Tumor size, median (range)         | 2 cm (0.5–7)                                                 |
| Number of implants, median (range) | 1(1–10)                                                      |
| Specific death events              | 7*                                                           |
| Non-specific deaths                | 4**                                                          |
| Recurrence events                  | ND = 11<br>No recurrence = 43<br>Recurrence = 33             |
| Time to recurrence, median (range) | 186 d (96–433)                                               |
| Stage of recurrence                | Ta = 12<br>T1 = 12<br>T2 = 3<br>ND = 6                       |
| Grade of recurrence                | Low = 12<br>High = 12<br>PUNLMP = 1<br>CIS = 2<br>ND = 6     |

(Continued)

| <b>Patients (n)</b>             | <b>87</b>                                            |
|---------------------------------|------------------------------------------------------|
| Previous tumor (non bladder)    | 16                                                   |
| Treatment by local instillation | ND = 23<br>Yes = 15 (14 BCG; 1 mitomycin)<br>No = 52 |

ND= Not determined

\* All deaths due to progression of invasive bladder cancer.

\*\* One patient died due to a lymphoma, another of sepsis secondary to mycosis fungoides, another due to progression of gastric tumor and another of chronic obstructive pulmonary disease decompensation

PUNLMP: Papillary urothelial neoplasia of low malignant potential

CIS: Carcinoma *in situ*

### **Supplementary Table S2:**

**See Supplementary Table S2 file**

### **Supplementary Table S3:**

**See Supplementary Table S3 file**

**Supplementary Table S4: Significant overlap of genes following the same expression pattern of miR-200 with oncogenic pathways from MSigDB\_Oncogenic\_Signatures database**

| Term                   | Description                                                                                                                       | Overlap | P-value    | Adjusted P-value |
|------------------------|-----------------------------------------------------------------------------------------------------------------------------------|---------|------------|------------------|
| E2F1_UP.V1_DN          | Genes down-regulated in mouse fibroblasts over-expressing E2F1                                                                    | 45/193  | 5.4151E-08 | 3.8332E-06       |
| ATF2_S_UP.V1_DN        | Genes down-regulated in myometrial cells over-expressing a shortened splice form of ATF2 [GeneID = 1386] gene.                    | 44/187  | 6.0844E-08 | 3.8332E-06       |
| P53_DN.V1_DN           | Genes down-regulated in NCI-60 panel of cell lines with mutated TP53 [GeneID = 7157].                                             | 44/192  | 1.1614E-07 | 5.4876E-06       |
| BMI1_DN.V1_UP          | Genes up-regulated in DAOY cells (medulloblastoma) upon knockdown of BMI1 [GeneID = 648] gene by RNAi.                            | 37/147  | 1.6521E-07 | 6.2451E-06       |
| BMI1_DN_MEL18_DN.V1_UP | Genes up-regulated in DAOY cells (medulloblastoma) upon knockdown of BMI1 and PCGF2 [GeneID = 648] [GeneID = 7703] genes by RNAi. | 36/145  | 3.2163E-07 | 1.0131E-05       |
| KRAS.KIDNEY_UP.V1_UP   | Genes up-regulated in epithelial kidney cancer cell lines over-expressing an oncogenic form of KRAS [GeneID = 3845] gene.         | 35/145  | 8.2067E-07 | 2.201E-05        |
| LEF1_UP.V1_UP          | Genes up-regulated in DLD1 cells (colon carcinoma) over-expressing LEF1 [GeneID = 51176].                                         | 42/195  | 9.3165E-07 | 2.201E-05        |
| ATF2_UP.V1_DN          | Genes down-regulated in myometrial cells over-expressing ATF2 [GeneID = 1386] gene.                                               | 40/187  | 1.9556E-06 | 4.1068E-05       |
| MEL18_DN.V1_UP         | Genes up-regulated in DAOY cells (medulloblastoma) upon knockdown of PCGF2 [GeneID = 7703] gene by RNAi.                          | 33/141  | 2.986E-06  | 5.2722E-05       |
| PTEN_DN.V1_UP          | Genes up-regulated upon knockdown of PTEN [GeneID = 5728] by RNAi.                                                                | 40/191  | 3.0685E-06 | 5.2722E-05       |
| AKT_UP.V1_DN           | Genes down-regulated in mouse prostate by transgenic expression of human AKT1 gene [GeneID = 207] vs controls.                    | 39/187  | 4.4309E-06 | 6.4418E-05       |

**Supplementary Table S5: Significant overlap of genes following the opposite expression pattern of miR-200 with oncogenic pathways from MSigDB\_Oncogenic\_Signatures database**

| Term               | Description                                                                                                                                    | Overlap | P-value    | Adjusted P-value |
|--------------------|------------------------------------------------------------------------------------------------------------------------------------------------|---------|------------|------------------|
| IL15_UP.V1_UP      | Genes up-regulated in Sez-4 cells (T lymphocyte) that were first starved of IL2 [GeneID = 3558] and then stimulated with IL15 [GeneID = 3600]. | 27/192  | 0.00492204 | 0.4552887        |
| PRC2_EDD_UP.V1_UP  | Genes up-regulated in TIG3 cells (fibroblasts) upon knockdown of EED [GeneID = 8726] gene.                                                     | 28/193  | 0.00287295 | 0.4552887        |
| E2F3_UP.V1_DN      | Genes down-regulated in primary epithelial breast cancer cell culture over-expressing E2F3 [GeneID = 1871] gene.                               | 25/183  | 0.0091101  | 0.48997298       |
| MYC_UP.V1_UP       | Genes up-regulated in primary epithelial breast cancer cell culture over-expressing MYC [GeneID = 4609] gene.                                  | 25/186  | 0.0108324  | 0.48997298       |
| P53_DN.V1_UP       | Genes up-regulated in NCI-60 panel of cell lines with mutated TP53 [GeneID = 7157].                                                            | 25/194  | 0.01673918 | 0.51612458       |
| BCAT_BILD_ET_AL_UP | Genes up-regulated in primary epithelial breast cancer cell culture over-expressing activated CTNNB1 [GeneID = 1499] gene.                     | 8/49    | 0.05321878 | 0.99996626       |
| PRC1_BMI_UP.V1_UP  | Genes up-regulated in TIG3 cells (fibroblasts) upon knockdown of BMI1 [GeneID = 648] gene.                                                     | 22/190  | 0.05862928 | 0.99996626       |
| E2F1_UP.V1_UP      | Genes up-regulated in mouse fibroblasts over-expressing E2F1 [GeneID = 1869] gene.                                                             | 19/189  | 0.1817207  | 0.99996626       |

**Supplementary Table S6: Primers used for qPCR**

| Name           | Sequence                  |
|----------------|---------------------------|
| EZH2-RTspec    | CCTGTCGACATGTTTTGGTC      |
| EZH2-for       | CGGTGTCAAACGCCAATAAA      |
| EZH2-rev       | CCGCTCCACTCCACATTCTC      |
| VIM-RTspe      | AAGATTGCAGGGTGTTTTCG      |
| VIM-for        | GACCAGCTAACCAACGACAAA     |
| VIM -rev       | GAAGCATCTCCTCCTGCAAT      |
| CDH1-RTspec    | TGCTTAACCCCTCACCTTGAAGG   |
| CDH1-for       | GGTCTGTCATGGAAGGTGCT      |
| CDH1-rev       | GATGGCGGCATTGTAGGT        |
| ZEB 1-RTspec   | GTGTAAGTGCACAGGGAGCA      |
| ZEB 1-for      | TTTTTCCTGAGGCACCTGAA      |
| ZEB 1-rev      | TGAAAATGCATCTGGTGTTCC     |
| ZEB 2-RTspec   | TTCTTCTCGTGGCGGTACTION    |
| ZEB 2-for      | AGGAGCTGTCTCGCCTTG        |
| ZEB 2-rev      | GGCAAAAGCATCTGGAGTTC      |
| SNAIL 1-RTspec | GGACAGAGTCCCAGATGAGC      |
| SNAIL 1-for    | GCTGCAGGACTCTAATCCAGA     |
| SNAIL 1-rev    | ATCTCCGGAGGTGGGATG        |
| SLUG-RTspec    | GTTGGTCAGCACAGGAGAAAATGCC |
| SLUG-for       | TTCGGACCCACACATTACCT      |
| SLUG-rev       | TTGGAGCAGTTTTTGCACCTG     |
| TWIST-RTspec   | CACGCCCTGTTTCTTTGAA       |
| TWIST-for      | GGGCCGGAGACCTAGATG        |
| TWIST-rev      | TTCCAAGAAAATCTTTGGCATA    |
| BMI 1-RTspec   | ATGGTTGTGGCATCAATG AA     |
| BMI 1-for      | GCTTCAAGATGGCCGCTTG       |
| BMI 1-rev      | TTCTCGTTGTTTCGATGCATTC    |
| TBP-RTspec     | GTGTTTAAAATCTACATA        |
| TBP-for        | AGTGAAGAACAGTCCAGACTG     |
| TBP-rev        | CCAGGAAATAACTCTGGCTCAT    |

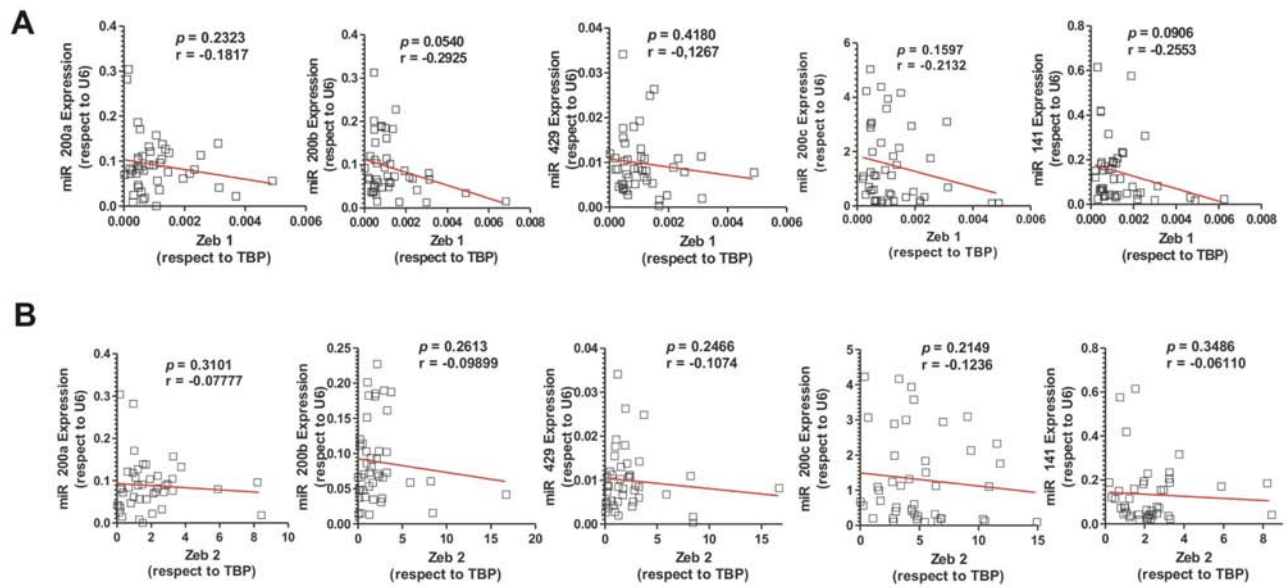

Supplementary Figure S1: Absence of significant correlation between the expression of miR-200 family members and ZEB1 A. and ZEB2 B. in NMIBC samples.

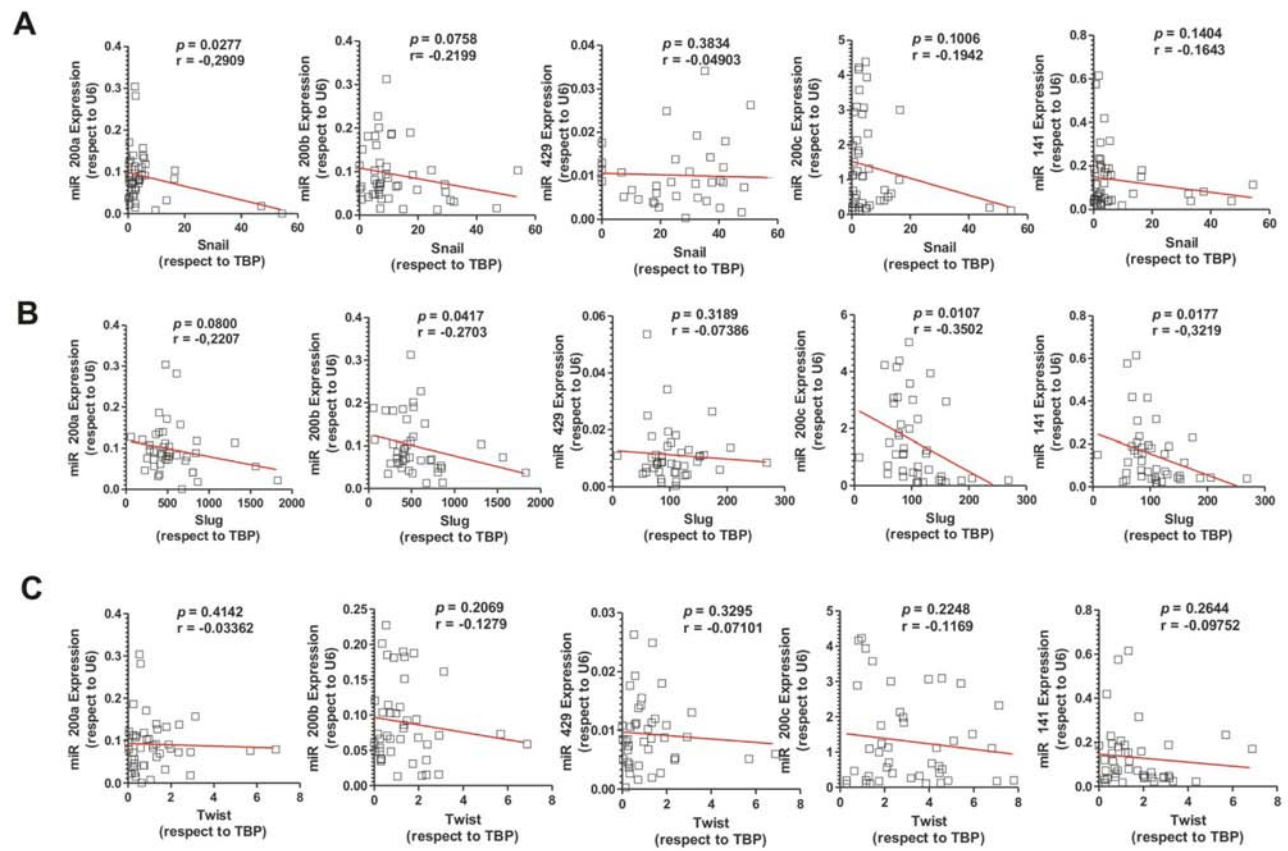

Supplementary Figure S2: Absence of significant correlation between the expression of miR-200 family members and *SNAIL* A. *SLUG* B. and *TWIST* C. in NMIBC samples.

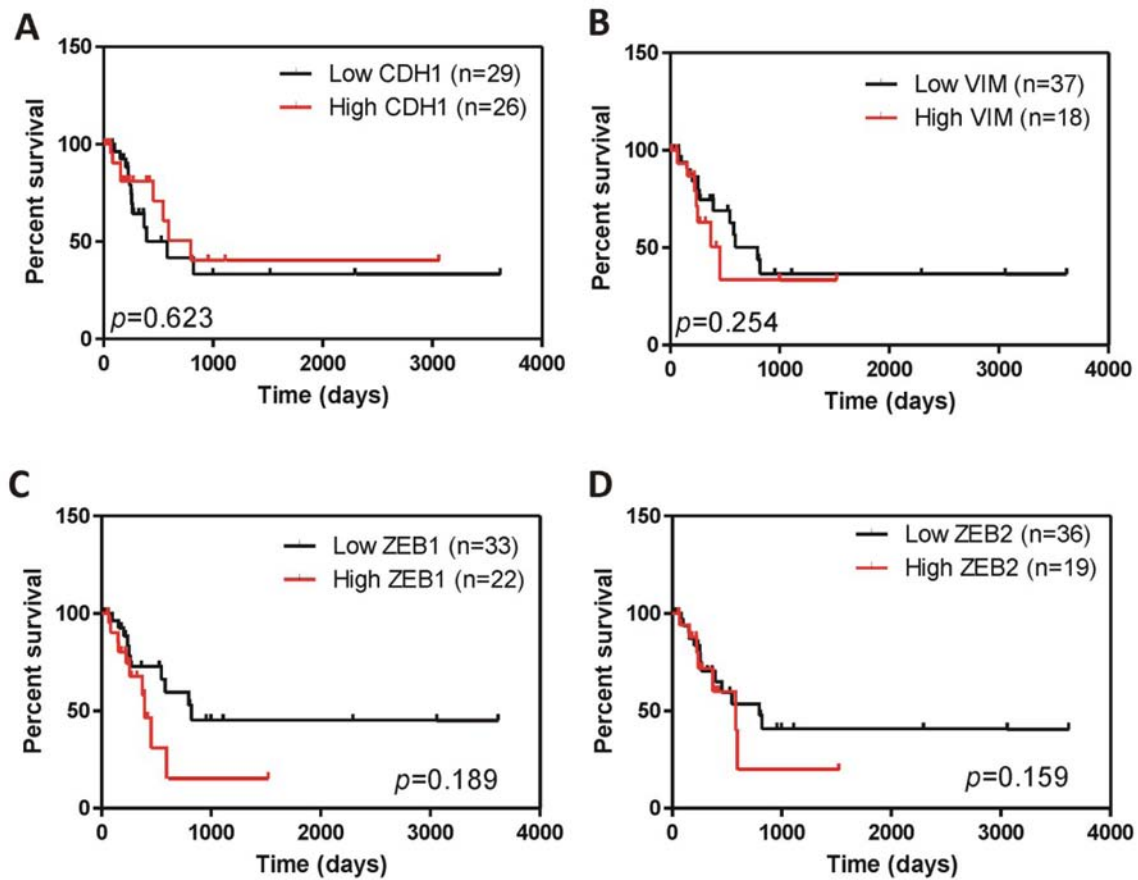

**Supplementary Figure S3: Kaplan Meyer distribution corresponding to the overall survival patients included in the TCGA database according the expression of E cadherin A. Vimentin B. ZEB1 C. and ZEB2 D. Patients were discriminated by the median values of expression from RNA seq data. p Values were obtained by the log rank test.**
